# Supplementary material for: Are deep eutectic solvents really green?: A life-cycle perspective
Source: Royal Society of Chemistry journal article supplement (doi:10.1039/d2gc01752k), 2022-01-01
Supplement: d2gc01752k1.pdf [file d2gc01752k1.pdf]

## Are deep eutectic solvents really green?: A life-cycle perspective

### Electronic Supplementary Information

Qammer Zaib,<sup>a</sup> Matthew J. Eckelman,<sup>b</sup> Yi Yang<sup>\*c,d,e</sup> and Daeseung Kyung<sup>\*a</sup>

<sup>a</sup> School of Civil and Environmental Engineering, University of Ulsan, Daehak-ro 93, Nam-gu, Ulsan 44610, Republic of Korea. E-mail: [dkyung@ulsan.ac.kr](mailto:dkyung@ulsan.ac.kr); Tel: +82-52-259-2259, Fax: +82-52-221-0152

<sup>b</sup> Department of Civil and Environmental Engineering, Northeastern University, 400 Snell Engineering Center, 360 Huntington Ave., Boston, MA 02115, United States

<sup>c</sup> Key Laboratory of the Three Gorges Reservoir Region's Eco-Environment, Ministry of Education, Chongqing University, Chongqing, 400045, PR China. E-mail: [yi.yang@cqu.edu.cn](mailto:yi.yang@cqu.edu.cn)

<sup>d</sup> The National Centre for International Research of Low-carbon & Green Buildings (Ministry of Science & Technology), Chongqing University, Chongqing, 40045, PR China

<sup>e</sup> The Joint International Research Laboratory of Green Buildings and Built Environments (Ministry of Education), Chongqing University, Chongqing, 40045, PR China

\*Corresponding authors: [yi.yang@cqu.edu.cn](mailto:yi.yang@cqu.edu.cn) (Yi Yang) & [dkyung@ulsan.ac.kr](mailto:dkyung@ulsan.ac.kr) (Daeseung Kyung)

**Table S1:** Ecoinvent unit processes for the foreground processes for choline chloride/urea (reline) deep eutectic solvent (DES) production.

| #  | Flow                    | Ecoinvent unit process                                                                                                                                     |
|----|-------------------------|------------------------------------------------------------------------------------------------------------------------------------------------------------|
| 1  | Ethylene oxide (EO)     | market for ethylene oxide   ethylene oxide   APOS, S - RoW                                                                                                 |
| 2  | Hydrochloric acid (HCl) | market for hydrochloric acid, without water, in 30% solution state   hydrochloric acid, without water, in 30% solution state   APOS, S - RoW               |
| 3  | Trimethylamine (TMA)    | market for trimethylamine   trimethylamine   APOS, S - RoW                                                                                                 |
| 4  | Deionized water (DI)    | market for water, deionised   water, deionised   APOS, S - RoW                                                                                             |
| 5  | Heat (steam)            | steam production, as energy carrier, in chemical industry   heat, from steam, in chemical industry   APOS, S - RoW                                         |
| 6  | Electricity             | electricity, high voltage, production mix   electricity, high voltage   APOS, S                                                                            |
| 7  | Urea                    | market for urea   urea   APOS, S - RoW                                                                                                                     |
| 8  | Methanol                | methanol production   methanol   APOS, S                                                                                                                   |
| 9  | Ethanol                 | market for ethanol, without water, in 99.7% solution state, from ethylene   ethanol, without water, in 99.7% solution state, from ethylene   APOS, S - RoW |
| 10 | Dichloromethane (DCM)   | dichloromethane production   dichloromethane   APOS, S                                                                                                     |
| 11 | Ethyl acetate           | ethyl acetate production   ethyl acetate   APOS, S                                                                                                         |
| 12 | Ethylene glycol (EG)    | market for ethylene glycol   ethylene glycol   APOS, S                                                                                                     |
| 13 | Glycerol (Gly)          | market for glycerine   glycerine   APOS, S - RoW                                                                                                           |
| 14 | Citric acid (CA)        | market for citric acid   citric acid   APOS, S - GLO                                                                                                       |
| 15 | Glucose (Glu)           | market for glucose   glucose   APOS, S - GLO                                                                                                               |

**Table S2:** Calculations of auxiliary processes for choline chloride and reline production

|                              |                  |                   |          | Ton       | kg         |
|------------------------------|------------------|-------------------|----------|-----------|------------|
| <b>MIXER</b>                 | <b>Q</b>         |                   | <b>J</b> | <b>MJ</b> | <b>KWh</b> |
|                              |                  |                   | 129600   | 0.13      | 3.60E-02   |
|                              | $\rho$           | kg/m <sup>3</sup> | 1000     |           | 3.60E-05   |
|                              | <b>t</b>         | s                 | 7200     |           |            |
| <b>REACTOR 1 (ChCl)</b>      | <b>Q</b>         |                   | <b>J</b> | <b>MJ</b> | <b>KWh</b> |
|                              |                  |                   | 3.58E+08 | 358.46    | 9.96E+01   |
|                              | Cp               | J/(kg*K)          | 4181     |           | 9.96E-02   |
|                              | m                | kg                | 1428     |           |            |
|                              | T(reaction)      | K                 | 343      |           |            |
|                              | <b>t</b>         | s                 | 7200     |           |            |
|                              | $\eta$ (heat)    |                   | 0.75     |           |            |
| <b>EVAPORATOR</b>            | <b>Q</b>         |                   | <b>J</b> | <b>MJ</b> |            |
|                              |                  |                   | 3.06E+09 | 3.06E+03  | 3.056722   |
|                              | Cp               | J/(kg*K)          | 4181     |           |            |
|                              | m                | kg                | 1428     |           |            |
|                              | T(boil)          | K                 | 373.15   |           |            |
|                              | To               | K                 | 298.15   |           |            |
|                              | $\Delta H$ (vap) | J/kg              | 2256453  |           |            |
|                              | m (vap)          | kg                | 885.28   |           |            |
|                              | $\eta$ (dry)     |                   | 0.8      |           |            |
| <b>GRINDER (urea)</b>        | <b>Q</b>         |                   | <b>J</b> | <b>MJ</b> | <b>KWh</b> |
|                              |                  |                   | 20053500 | 20.05     | 5.57E+00   |
|                              | m                | kg                | 461      |           | 5.57E-03   |
| <b>PRE-MIXER (ChCl+urea)</b> | <b>Q</b>         |                   | <b>J</b> | <b>MJ</b> | <b>KWh</b> |
|                              |                  |                   | 11404.8  | 0.01      | 3.17E-03   |
|                              | $\rho$           | kg/m <sup>3</sup> | 1320     |           | 3.17E-06   |
|                              | <b>t</b>         | s                 | 480      |           |            |
| <b>REACTOR 2 (Reline)</b>    | <b>Q</b>         |                   | <b>J</b> | <b>MJ</b> | <b>KWh</b> |
|                              |                  |                   | 2.68E+08 | 267.68    | 7.44E+01   |
|                              | Cp               | J/(kg*K)          | 4181     |           | 7.44E-02   |
|                              | m                | kg                | 1200     |           |            |
|                              | Tr               | K                 | 338.15   |           |            |
|                              | <b>t</b>         | s                 | 540      |           |            |
|                              | $\eta$ (heat)    |                   | 0.75     |           |            |

**Table S3** Environmental Impacts of the reline production process

| Impact category | Unit                   | EO       | HCl      | TMA      | DI       | Heat     | Electricity |
|-----------------|------------------------|----------|----------|----------|----------|----------|-------------|
| <b>GWP</b>      | kg CO <sub>2</sub> -Eq | 1.78E+02 | 1.40E+02 | 2.66E+02 | 6.32E-02 | 3.66E+02 | 7.14E+01    |
| <b>FEP</b>      | kg P-Eq                | 4.15E-02 | 6.77E-02 | 5.02E-02 | 2.62E-05 | 4.37E-02 | 5.78E-04    |
| <b>TAP</b>      | kg SO <sub>2</sub> -Eq | 5.43E-01 | 7.53E-01 | 9.15E-01 | 4.01E-04 | 1.07E+00 | 1.29E-01    |
| <b>MDP</b>      | kg Fe-Eq               | 4.68E+00 | 1.63E+01 | 1.17E+01 | 8.75E-03 | 1.75E+00 | 3.44E-01    |
| <b>WDP</b>      | m <sup>3</sup>         | 3.33E-01 | 6.06E-01 | 6.55E-01 | 1.53E-01 | 6.76E-01 | 9.80E-03    |
| <b>FETP</b>     | kg 1,4-DCB-Eq          | 2.58E+00 | 7.81E+00 | 5.61E+00 | 3.88E-03 | 1.88E+00 | 2.88E-01    |
| <b>HTP</b>      | kg 1,4-DCB-Eq          | 3.37E+01 | 9.85E+01 | 5.60E+01 | 3.09E-02 | 5.34E+01 | 2.49E+00    |

  

| Impact category | Unit                   | ChCl     | Electricity | Urea     | Reline (per ton) | Reline (per kg) |
|-----------------|------------------------|----------|-------------|----------|------------------|-----------------|
| <b>GWP</b>      | kg CO <sub>2</sub> -Eq | 1.02E+03 | 3.22E+01    | 7.67E+02 | 1.82E+03         | 1.82E+00        |
| <b>FEP</b>      | kg P-Eq                | 2.04E-01 | 3.46E-02    | 2.33E-01 | 4.71E-01         | 4.71E-04        |
| <b>TAP</b>      | kg SO <sub>2</sub> -Eq | 3.41E+00 | 5.87E-02    | 3.41E+00 | 6.88E+00         | 6.88E-03        |
| <b>MDP</b>      | kg Fe-Eq               | 3.47E+01 | 2.99E-01    | 5.19E+01 | 8.70E+01         | 8.70E-02        |
| <b>WDP</b>      | m <sup>3</sup>         | 2.43E+00 | 1.73E-01    | 2.18E+00 | 4.78E+00         | 4.78E-03        |
| <b>FETP</b>     | kg 1,4-DCB-Eq          | 1.82E+01 | 6.67E-01    | 2.19E+01 | 4.07E+01         | 4.07E-02        |
| <b>HTP</b>      | kg 1,4-DCB-Eq          | 2.44E+02 | 2.19E+01    | 2.51E+02 | 5.17E+02         | 5.17E-01        |

**Table S4** Environmental Impacts of the reline and conventional organic solvents (1.0 kg reline, 1.0 kg methanol, 1.0 kg ethanol, 2.4 kg DCM, and 1.2 kg ethyl acetate)

| Indicator   | Unit                   | Reline   | Methanol | Ethanol  | DCM      | Ethyl acetate |
|-------------|------------------------|----------|----------|----------|----------|---------------|
| <b>GWP</b>  | kg CO <sub>2</sub> -Eq | 1.82E+00 | 5.90E-01 | 9.67E-01 | 8.23E+00 | 3.60E+00      |
| <b>FEP</b>  | kg P-Eq                | 4.71E-04 | 5.79E-05 | 1.80E-04 | 1.62E-04 | 1.45E-03      |
| <b>TAP</b>  | kg SO <sub>2</sub> -Eq | 6.88E-03 | 1.74E-03 | 1.39E-02 | 5.01E-02 | 1.56E-02      |
| <b>MDP</b>  | kg Fe-Eq               | 8.70E-02 | 1.18E-02 | 2.29E-02 | 5.39E-03 | 1.45E-01      |
| <b>WDP</b>  | m <sup>3</sup>         | 4.78E-03 | 4.29E-03 | 1.03E-02 | 2.51E-02 | 5.10E-02      |
| <b>FETP</b> | kg 1,4-DCB-Eq          | 4.07E-02 | 1.04E-02 | 2.37E-02 | 9.52E-03 | 9.30E-02      |
| <b>HTP</b>  | kg 1,4-DCB-Eq          | 5.17E-01 | 8.58E-02 | 1.40E-01 | 1.31E+00 | 1.10E+00      |

**Table S5** Toxicity (LD<sub>50</sub> based on oral-rat) of conventional solvents and the constituents of DESs.

All the values are obtained from RSC ChemSpider database.

| Chemical (Solvent) | LD <sub>50</sub> (mg/kg) | Chemical (DES constituent) | LD <sub>50</sub> (mg/kg) |
|--------------------|--------------------------|----------------------------|--------------------------|
| Methanol           | 5,628                    | Choline Chloride           | 3,400                    |
| Ethanol            | 7,060                    | Urea                       | 8,471                    |
| DCM                | 1,600                    | Ethylene glycol            | 4,700                    |
| Ethyl acetate      | 5,620                    | Glycerol                   | 8,700                    |
|                    |                          | Citric acid                | 11,700                   |
|                    |                          | Glucose                    | 25,800                   |

**Table S6** Environmental Impacts of the reline and other choline chloride-based DESs including NADES (1 kg each).

| <b>Indicator</b> | <b>Unit</b>            | <b>Reline</b> | <b>ChCl:EG</b> | <b>ChCl:Gly</b> | <b>ChCl:CA</b> | <b>ChCl:Glu</b> |
|------------------|------------------------|---------------|----------------|-----------------|----------------|-----------------|
| <b>GWP</b>       | kg CO <sub>2</sub> -Eq | 1.82E+00      | 2.00E+00       | 2.55E+00        | 4.30E+00       | 1.61E+00        |
| <b>FEP</b>       | kg P-Eq                | 4.71E-04      | 4.39E-04       | 4.90E-04        | 1.29E-03       | 4.26E-04        |
| <b>TAP</b>       | kg SO <sub>2</sub> -Eq | 6.88E-03      | 6.51E-03       | 9.84E-03        | 2.58E-02       | 1.02E-02        |
| <b>MDP</b>       | kg Fe-Eq               | 8.70E-02      | 7.51E-02       | 7.41E-02        | 2.43E-01       | 1.01E-01        |
| <b>WDP</b>       | m <sup>3</sup>         | 5.00E-03      | 4.61E-03       | 3.51E-02        | 2.00E-01       | 9.45E-03        |
| <b>FETP</b>      | kg 1,4-DCB-Eq          | 4.07E-02      | 3.83E-02       | 4.77E-02        | 1.29E-01       | 5.04E-02        |
| <b>HTP</b>       | kg 1,4-DCB-Eq          | 5.17E-01      | 4.69E-01       | 4.38E-01        | 1.51E+00       | 4.44E-01        |
